# Supplementary material for: Discontinuation of Long-Acting Reversible Contraceptive methods and associated factors among women in health facilities of Bahir Dar city, Northwest Ethiopia: A Cross-sectional study
Source: Research Square preprint supplement (doi:10.21203/rs.3.rs-1212900/v1), 2022-01-21
Supplement: Supplementary file 1 [file 95a90293bcecb48b1e0ef998.docx]

**Table 6: Factors associated with LARCs discontinuation among user women in Health facilities of Bahir Dar city, Northwest Ethiopia, 2021 (n=415)**

| **Variables** | **LARC Discontinued**  **Yes (N, %) No (N,%)** | | **COR**  **(95% CI)** | **AOR**  **(95% CI)** | **P-value** |
| --- | --- | --- | --- | --- | --- |
| **Religion**  Orthodox  Muslim  Protestant  Others© | 194(63.8%)  64(78%) 11(64.7%)  6(50%) | 110(36.2%)  18(22%)  6(35.3%)  6(50%) | 1  0.49(0.280-0.880)*  0.96(0.346-2.673)  1.76(0.555-5.601) | 1  0.69(0.363-1.298)  1.20(0.378-3.821)  1.64(0.448-6.014) | .247  .755  .454 |
| **Occupation**  Housewife  Merchant  Private employee  Student  Government employee | 114(66.3%) 47(77%)  36(80%)  29(49.2%)  49(62.8%) | 58(33.7%) 14(23%)  9(20%) 30(50.8%) 29(37.2%) | 0.86(0.492-1.501)  0.50(0.237-1.069)  0.42(0.178- 0.901*  1.75(0.880- 3.473)  1 | 1.07(0.569-1.998)  0.77(0.333-1-768) 0.53(0.209-1.333) 0.704(0.797-3.643)  1 | .842  .535  .176  .169 |
| **Education**  Unable to read & write  Read & write  Primary  Secondary  College & above | 45(68.2%)  62(81.6%)  44(74.6%)  65(59.6%)  59(56.2%) | 21(31.8%)  14(18.4%)  15(25.4%)  44(40.4%)  46(43.8%) | 0.59(0.314-1.142)  0.29(0.144-0.581)***  0.44(0.217-0.882) *****  0.87(0.504-1.495)  1 | 0.44(0.220-0.885)  0.31(0.148-0.63)  0.39(0.184-0.812) 0.85(0.478-1.496)  1 | **.021**  **.001**  **.012**  .565 |
| **Pregnancy desire**  Yes  No | 169(66.5%)  134(83.2%) | 85(33.5%)  27(16.8%) | 2.49(1.647-3.851) *******  1 | 2.57(1.639-4.020)  1 | **<.001** |
| **Type of LARC used**  Implanon  IUCDSaddless | 191(64.1%)  13(59.1%)  71(74.7%) | 107(35.9%) 9(40.9%) 24(25.3%) | 1.66(0.485-0.997)  2.05(0.778-5.390)  1 | 1.53(0.878-2.680)  2.38(0.847-6.948)  1 | .133  .112 |
| **Past contraception**  Yes  No | 227(69.4%) 48(54.5%) | 100(30.6%) 40(45.5%) | 1  1.89(1.169-3.060) ****** | 1  2.01(1.192-3.376) | **.009** |
| **Counseling on the benefit of LARC**  Yes  No | 152(70.7%)  123(61.5%) | 63(29.3%)  77(38.5%) | 1  1.51(1.003-2.274) * | 1  1.68(1.081-2.624) | **.021** |
| **Ever side effect**  Yes  No | 158(52.1%) 76(67.9%) | 145(47.9%) 36(32.1%) | 1.94(1.221-2.983*  1 | 1.95(1.207-3.164  1 | **.006** |
| **Follow up**  Yes  No | 132(63.5%) 143(69.1%) | 76(36.5%) 64(30.9%) | 1.29(0.655-0.985)  1 | 1.39(0.885-2.172)  1 | .154 |

* P-value less than 0.05 **P-value less than 0.01 ***P-value less than 0.001 ©Catholic & Adventist
